# Supplementary material for: The retention benefits of cumulative versus non-cumulative midterms in introductory biology may depend on students’ reasoning skills
Source: PLOS journal article supplement (doi:10.1371/journal.pone.0250143), 2021-04-22

S2 Figure: Student attitudes regarding cumulative and non-cumulative midterms.

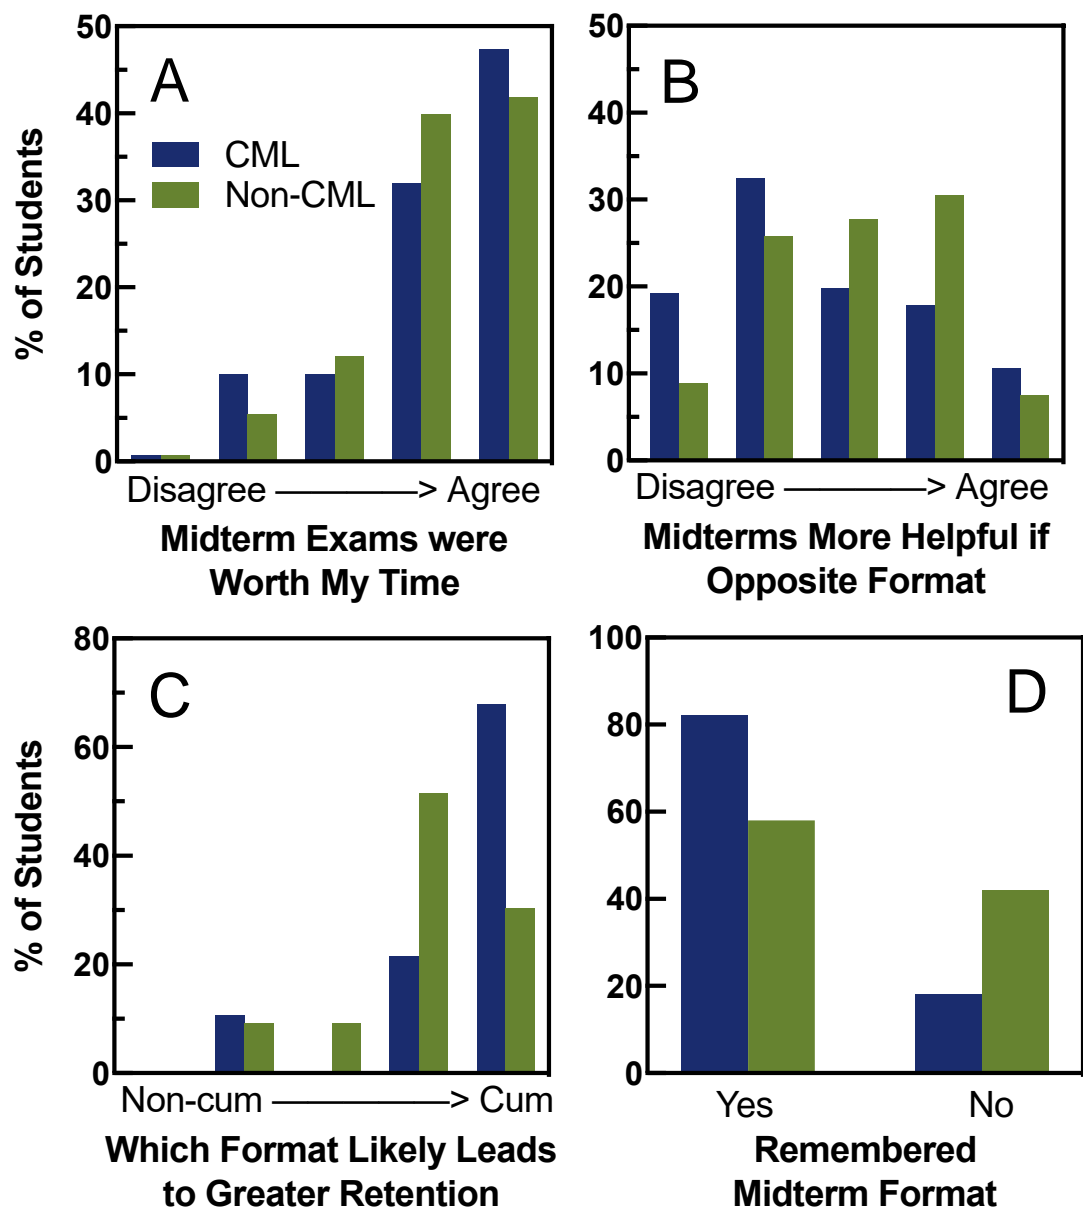

Supplement: S12 (10.1371/journal.pone.0250143.s012) [file journal.pone.0250143.s012]
